# Supplementary material
Source: Springer Nature journal article supplement (https://www.springermedizin.de/resource/supplementary/12888_2009_748_MOESM1_ESM.pdf/9478802)
Supplement: MOESM1 [file 9478802]

Treated with atypical antipsychotics  
N=198,919

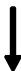

18-65  
Not treated with clozapine  
No mail order prescriptions  
6 months pre-index enrollment  
12 months post-index enrollment  
N=33,717

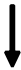

No nursing home or hospice care  
Outpatient at least 7 days post-index  
N=32,588

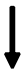

Bipolar Disorder  
No Schizophrenia Codes  
N=7,169

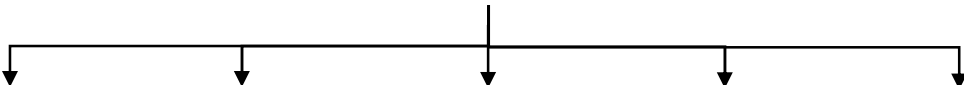

Aripiprazole  
N=776

Ziprasidone  
N=492

Olanzapine  
N=1,919

Quetiapine  
N=2,497

Risperidone  
N=1,485
